# Supplementary material for: Mapping the reduction in carbon uptake in subarctic birch forestsdue to insect outbreaks
Source: Copernicus journal article supplement (doi:10.5194/bg-2016-345), 2016-09-28
Supplement: Supplementary file 1 [file bg-2016-345-supplement.zip]

Archive with 3 entries (3 files):
- Suppl_Table_S1.pdf
- Suppl_FigureS1.png
- Suppl_FigureS2.png
