# Supplementary material for: Mapping the reduction in carbon uptake in subarctic birch forestsdue to insect outbreaks
Source: Copernicus journal article supplement (doi:10.5194/bg-2016-345), 2016-09-28
Supplement: Supplementary file 1 [file bg-2016-345-supplement.zip › Suppl_Table_S1.pdf]

**Table S1. Variables used in the developed method with descriptions.**

| Variable                      | Description                                                                                                      |
|-------------------------------|------------------------------------------------------------------------------------------------------------------|
| $\epsilon_{\max}$             | Maximum light use efficiency for undisturbed birch forest                                                        |
| $\epsilon_{\max, \text{def}}$ | Maximum light use efficiency for defoliated birch forest                                                         |
| $f_{8\text{day}}$             | Reduction factor that reduces $\epsilon_{\max}$ depending in temperature                                         |
| $f\text{APAR}_{8\text{day}}$  | fAPAR for a MODIS 8-day period                                                                                   |
| $\text{GDD}_{\text{thres}}$   | Threshold set to control when temperature no longer influences $\epsilon_{\max}$                                 |
| $\text{GPP}_{\text{lue}}$     | GPP estimated with the LUE model                                                                                 |
| $\text{GPP}_{\text{EC}}$      | GPP derived from the EC-data                                                                                     |
| $\text{NDVI}_{\text{DL}}$     | NDVI smoothed with double logistic functions in TIMESAT                                                          |
| $P_{\text{frost}}$            | Reduction factor the influence $f_{8\text{day}}$ depending on frost events                                       |
| $\text{PAR}_{8\text{day}}$    | Mean daily PAR over an MODIS 8-day period                                                                        |
| $S_{\text{GDD}}$              | Reduction factor that influence $f_{8\text{day}}$ depending on $P_{\text{frost}}$ and GDD                        |
| $T_{\text{mean}8}$            | Mean temperature for a MODIS 8-day period                                                                        |
| $T_{\text{min}8}$             | Min temp for a MODIS 8-day period                                                                                |
| $T_{\text{thres}}$            | Factor controlling how $T_{\text{mean}8}$ influences $f_{8\text{day}}$ in the 2 <sup>nd</sup> part of the season |
