# Supplementary figures and images for: Mapping the reduction in carbon uptake in subarctic birch forestsdue to insect outbreaks
Source: Copernicus journal article supplement (doi:10.5194/bg-2016-345), 2016-09-28

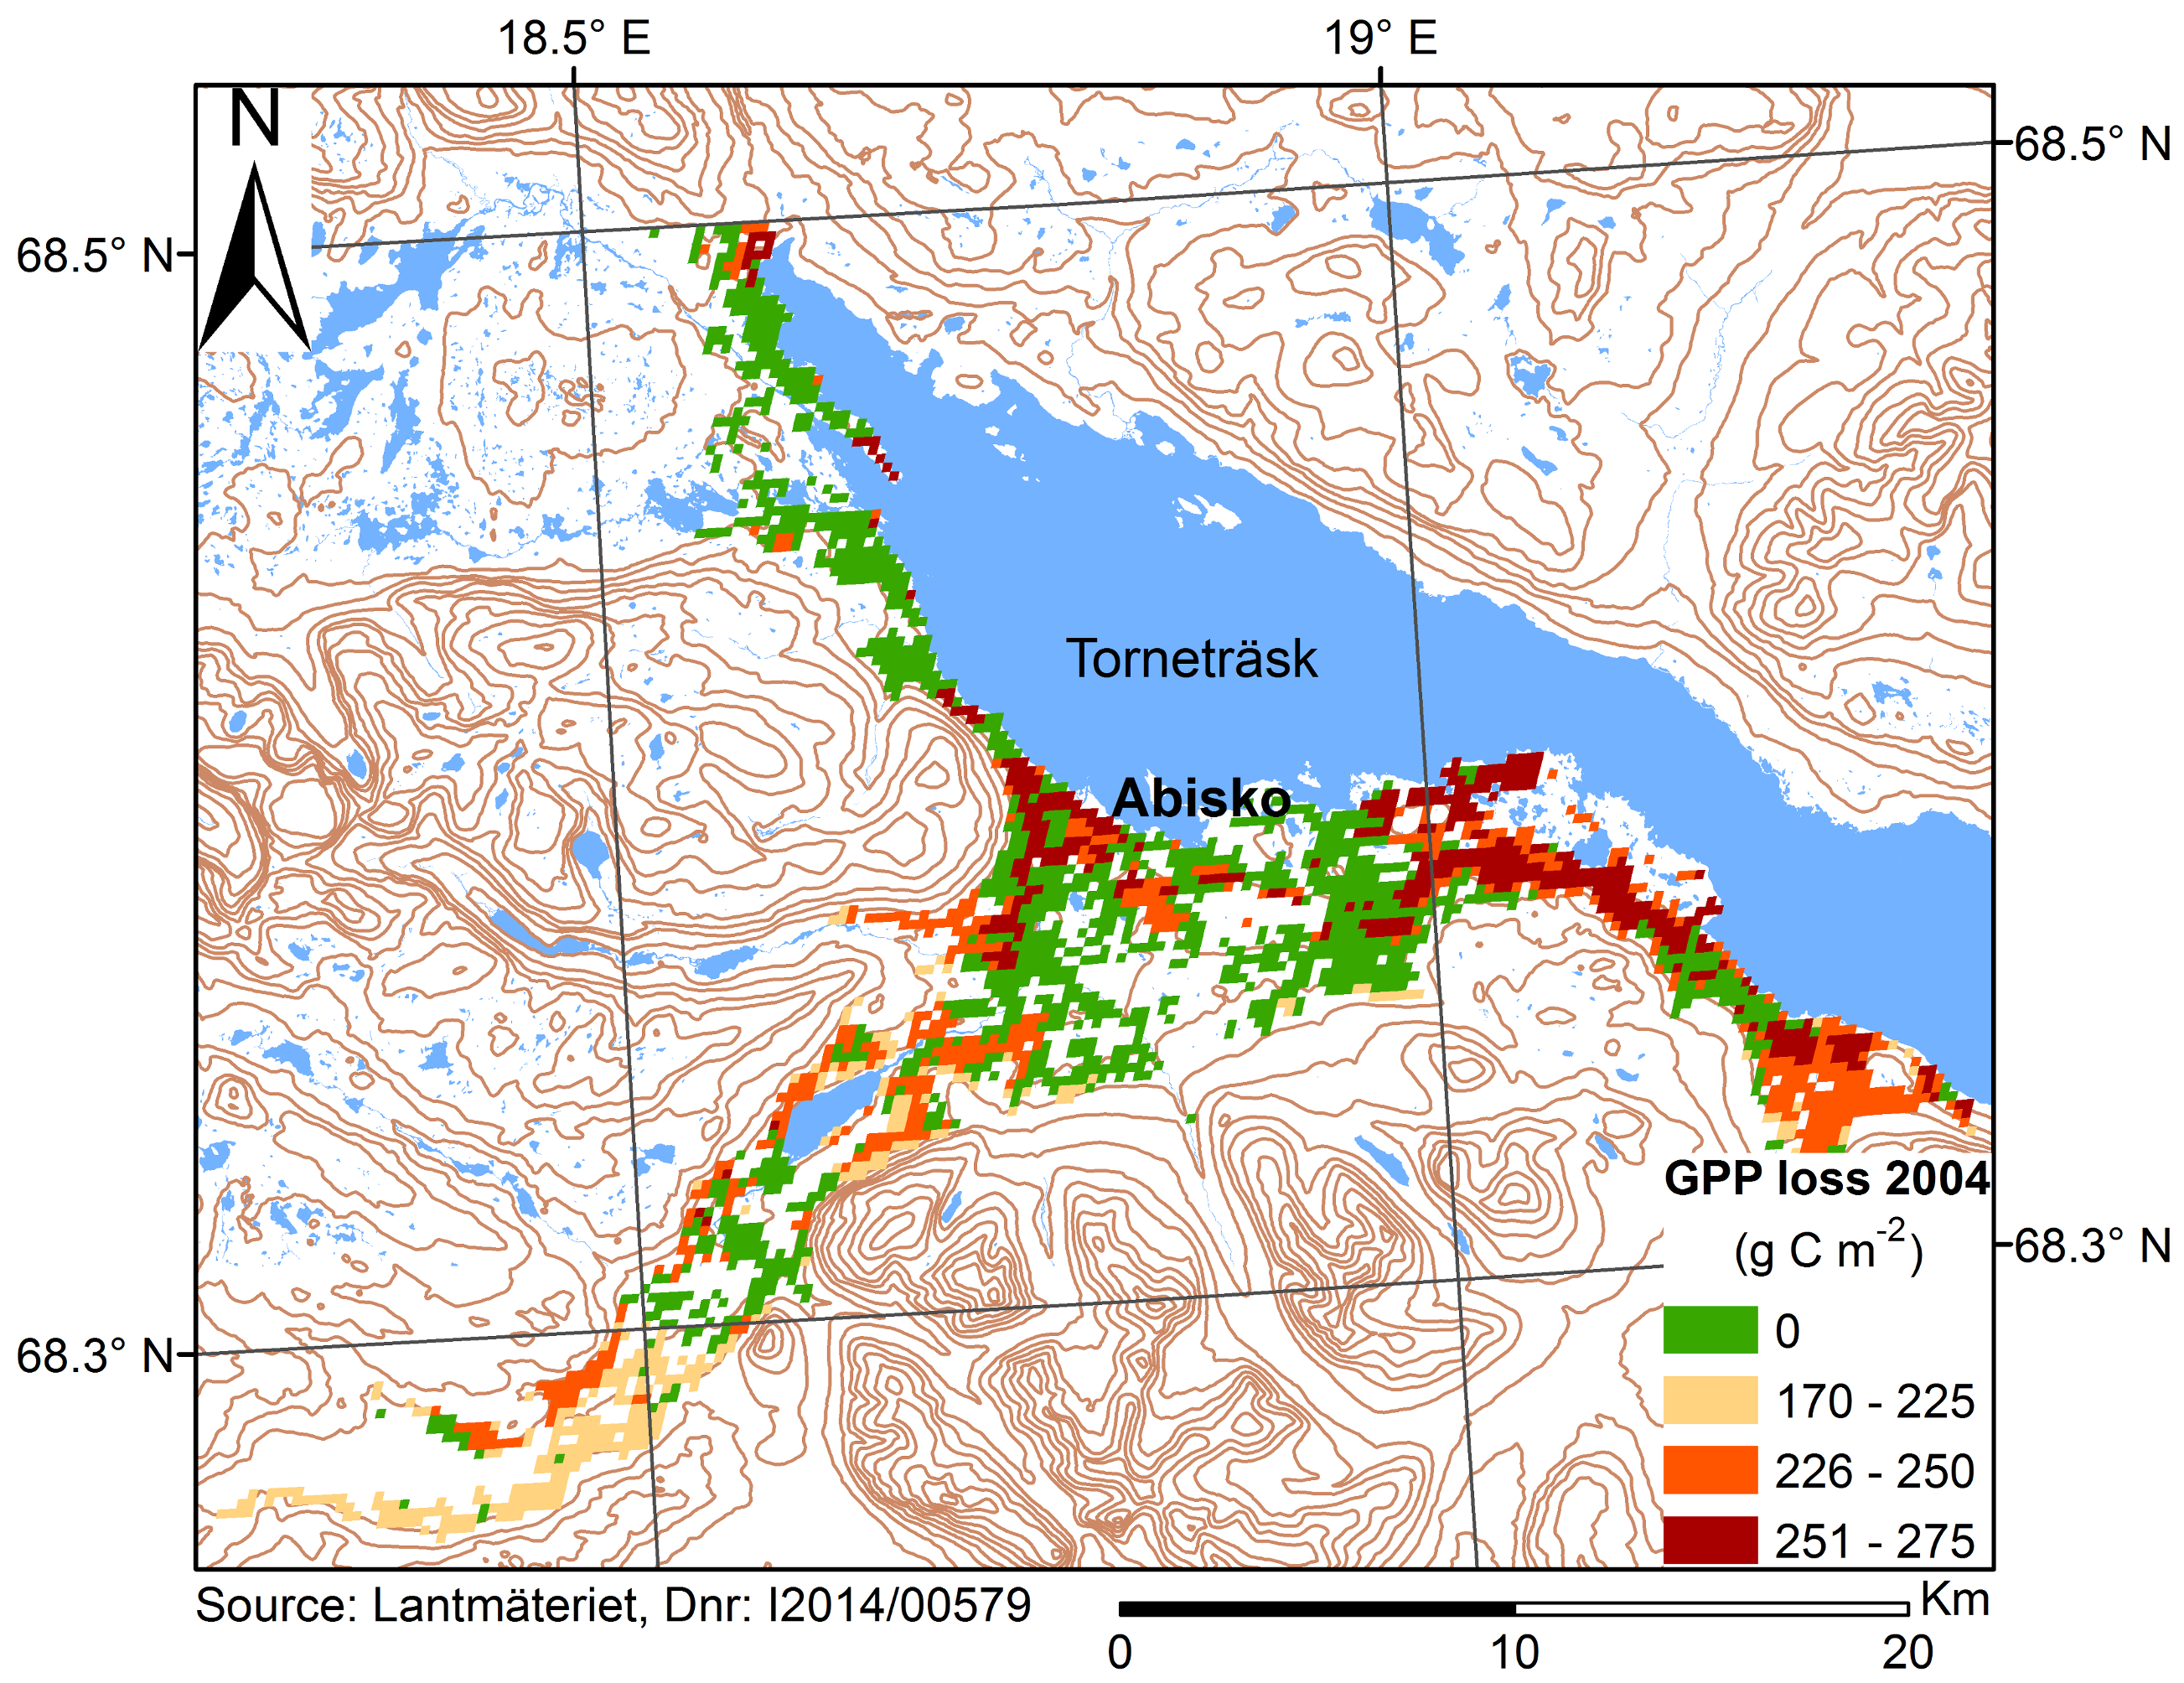

Supplement: Supplementary file 1 [file bg-2016-345-supplement.zip › Suppl_FigureS1.png]

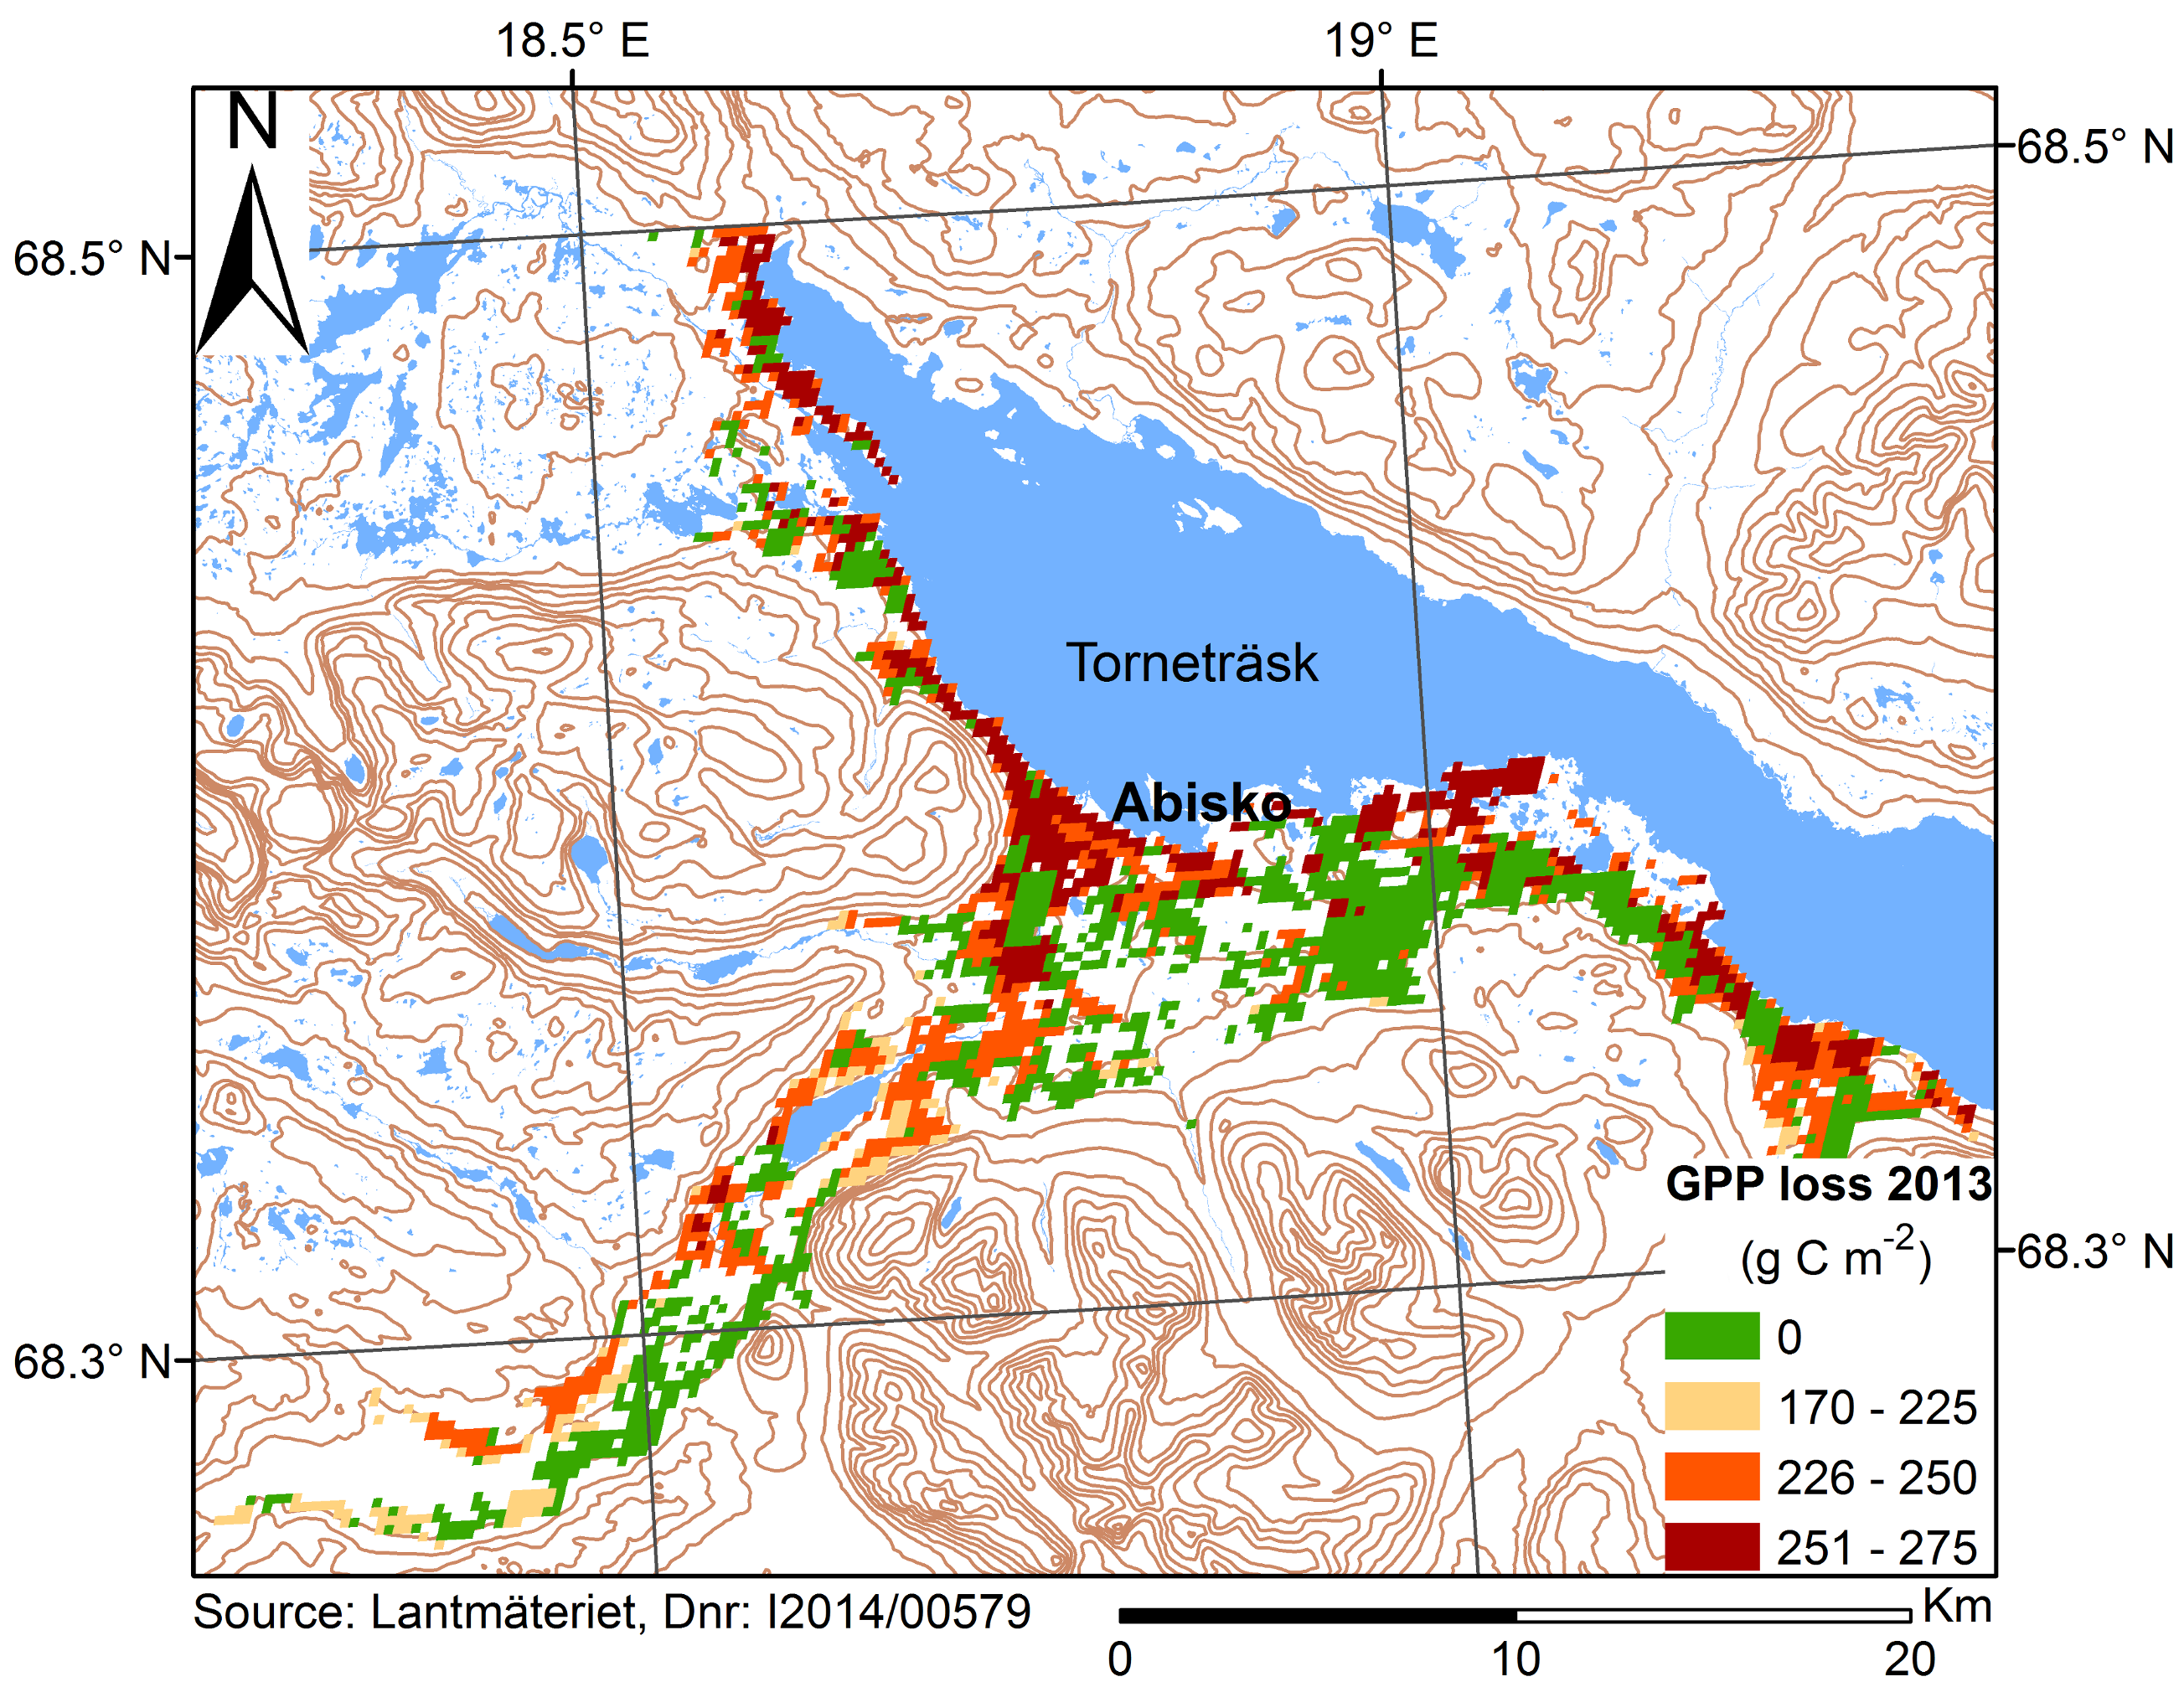

Supplement: Supplementary file 1 [file bg-2016-345-supplement.zip › Suppl_FigureS2.png]
